# Supplementary material
Source: publisher figshare collection journal article supplement (https://frontiersin.figshare.com/ndownloader/files/26823842)
Supplement: Supplementary file 1 [file 26823842]

**Appendix**

**Table A1 (partial).** Feeling thermometer by perceived personality trait

|  |  |  |  |  |  |  |  |  |  |  |  |  |
| --- | --- | --- | --- | --- | --- | --- | --- | --- | --- | --- | --- | --- |
|  | **Candidate vignette:**  **Extraversion** | | | **Candidate vignette:**  **Agreeableness** | | | **Candidate vignette:**  **Conscientiousness** | | | **Candidate vignette:**  **Emotional stability** | | |
|  |  |  |  |  |  |  |  |  |  |  |  |  |
|  |  |  |  |  |  |  |  |  |  |  |  |  |
|  | **M1** |  |  | **M2** |  |  | **M3** |  |  | **M4** |  |  |
|  | Coef. | Se | sig | Coef. | Se | sig | Coef. | Se | sig | Coef. | Se | sig |
|  |  |  |  |  |  |  |  |  |  |  |  |  |
|  |  |  |  |  |  |  |  |  |  |  |  |  |
| Perceived Extraversion | -0.36 | (1.08) |  |  |  |  |  |  |  |  |  |  |
| Perceived Agreeableness |  |  |  | 5.06 | (0.91) | *** |  |  |  |  |  |  |
| Perceived Conscientiousness |  |  |  |  |  |  | 3.35 | (1.07) | ** |  |  |  |
| Perceived Emotional stability |  |  |  |  |  |  |  |  |  | 3.74 | (1.11) | *** |
|  |  |  |  |  |  |  |  |  |  |  |  |  |
| Constant | 67.07 | (6.66) | *** | 44.06 | (5.19) | *** | 47.70 | (6.57) | *** | 49.88 | (6.82) | *** |
|  |  |  |  |  |  |  |  |  |  |  |  |  |
|  |  |  |  |  |  |  |  |  |  |  |  |  |
| Observations | 249 |  |  | 250 |  |  | 234 |  |  | 245 |  |  |
| R-squared | 0.00 |  |  | 0.11 |  |  | 0.04 |  |  | 0.04 |  |  |
|  |  |  |  |  |  |  |  |  |  |  |  |  |

In all models the dependent variable is the feeling thermometer for the fictive candidate, and ranges between 0 “very cold” and 100 “very warm” feelings towards him.

*** p<0.001, ** p<0.01, * p<0.05, † p<0.1

**Table A1 (continued).** Feeling thermometer by perceived personality trait

|  |  |  |  |  |  |  |  |  |  |  |  |  |
| --- | --- | --- | --- | --- | --- | --- | --- | --- | --- | --- | --- | --- |
|  | **Candidate vignette:**  **Openness** | | | **Candidate vignette:**  **Narcissism** | | | **Candidate vignette:**  **Psychopathy** | | | **Candidate vignette:**  **Machiavellianism** | | |
|  |  |  |  |  |  |  |  |  |  |  |  |  |
|  |  |  |  |  |  |  |  |  |  |  |  |  |
|  | **M5** |  |  | **M6** |  |  | **M7** |  |  | **M8** |  |  |
|  | Coef. | Se | sig | Coef. | Se | sig | Coef. | Se | sig | Coef. | Se | sig |
|  |  |  |  |  |  |  |  |  |  |  |  |  |
|  |  |  |  |  |  |  |  |  |  |  |  |  |
| Perceived Openness | 4.90 | (1.02) | *** |  |  |  |  |  |  |  |  |  |
| Perceived Narcissism |  |  |  | -13.50 | (1.43) | *** |  |  |  |  |  |  |
| Perceived Psychopathy |  |  |  |  |  |  | -9.62 | (1.18) | *** |  |  |  |
| Perceived Machiavellianism |  |  |  |  |  |  |  |  |  | -11.74 | (1.30) | *** |
|  |  |  |  |  |  |  |  |  |  |  |  |  |
| Constant | 38.25 | (5.41) | *** | 124.87 | (8.60) | *** | 93.70 | (6.31) | *** | 105.14 | (7.69) | *** |
|  |  |  |  |  |  |  |  |  |  |  |  |  |
|  |  |  |  |  |  |  |  |  |  |  |  |  |
| Observations | 251 |  |  | 247 |  |  | 247 |  |  | 248 |  |  |
| R-squared | 0.09 |  |  | 0.27 |  |  | 0.21 |  |  | 0.25 |  |  |
|  |  |  |  |  |  |  |  |  |  |  |  |  |

In all models the dependent variable is the feeling thermometer for the fictive candidate, and ranges between 0 “very cold” and 100 “very warm” feelings towards him.

*** p<0.001, ** p<0.01, * p<0.05, † p<0.1

**Table A2 (partial).** Feeling thermometer by perceived personality trait * strength of partisanship

|  |  |  |  |  |  |  |  |  |  |  | |  |  |
| --- | --- | --- | --- | --- | --- | --- | --- | --- | --- | --- | --- | --- | --- |
|  | **Candidate vignette:**  **Extraversion** | | | **Candidate vignette:**  **Agreeableness** | | | **Candidate vignette:**  **Conscientiousness** | | | | **Candidate vignette:**  **Emotional stability** | | |
|  |  |  |  |  |  |  |  |  |  |  | |  |  |
|  |  |  |  |  |  |  |  |  |  |  | |  |  |
|  | **M1** |  |  | **M2** |  |  | **M3** |  |  | **M4** | |  |  |
|  | Coef. | Se | sig | Coef. | Se | sig | Coef. | Se | sig | Coef. | | Se | sig |
|  |  |  |  |  |  |  |  |  |  |  | |  |  |
|  |  |  |  |  |  |  |  |  |  |  | |  |  |
| Strength of partisanship (SP) a | 24.19 | (18.84) |  | 33.82 | (9.83) | *** | 0.96 | (16.21) |  | 45.85 | | (14.79) | ** |
|  |  |  |  |  |  |  |  |  |  |  | |  |  |
| Perceived Extraversion (E) | 2.40 | (2.67) |  |  |  |  |  |  |  |  | |  |  |
| SP * E | -3.44 | (2.97) |  |  |  |  |  |  |  |  | |  |  |
|  |  |  |  |  |  |  |  |  |  |  | |  |  |
| Perceived Agreeableness (A) |  |  |  | 7.60 | (1.40) | *** |  |  |  |  | |  |  |
| SP * A |  |  |  | -5.08 | (1.76) | ** |  |  |  |  | |  |  |
|  |  |  |  |  |  |  |  |  |  |  | |  |  |
| Perceived Conscient. (C) |  |  |  |  |  |  | 3.18 | (2.11) |  |  | |  |  |
| SP * C |  |  |  |  |  |  | 0.23 | (2.63) |  |  | |  |  |
|  |  |  |  |  |  |  |  |  |  |  | |  |  |
| Perceived Emotional stab. (Es) |  |  |  |  |  |  |  |  |  | 6.18 | | (1.92) | ** |
| SP * Es |  |  |  |  |  |  |  |  |  | -6.66 | | (2.42) | ** |
|  |  |  |  |  |  |  |  |  |  |  | |  |  |
| Constant | 50.54 | (17.23) | ** | 29.68 | (7.77) | *** | 47.45 | (13.25) | *** | 33.03 | | (11.75) | ** |
|  |  |  |  |  |  |  |  |  |  |  | |  |  |
|  |  |  |  |  |  |  |  |  |  |  | |  |  |
| Observations | 176 |  |  | 172 |  |  | 168 |  |  | 179 | |  |  |
| R-squared | 0.01 |  |  | 0.21 |  |  | 0.04 |  |  | 0.08 | |  |  |
|  |  |  |  |  |  |  |  |  |  |  | |  |  |

In all models the dependent variable is the feeling thermometer for the fictive candidate, and ranges between 0 “very cold” and 100 “very warm” feelings towards him.

a Binary variable (0 “Weak party attachment”, 1 “Strong party attachment”).

*** p<0.001, ** p<0.01, * p<0.05, † p<0.1

**Table A2 (continued).** Feeling thermometer by perceived personality trait * strength of partisanship

|  |  |  |  |  |  |  |  |  |  |  |  |  |
| --- | --- | --- | --- | --- | --- | --- | --- | --- | --- | --- | --- | --- |
|  | **Candidate vignette:**  **Openness** | | | **Candidate vignette:**  **Narcissism** | | | **Candidate vignette:**  **Psychopathy** | | | **Candidate vignette:**  **Machiavellianism** | | |
|  |  |  |  |  |  |  |  |  |  |  |  |  |
|  |  |  |  |  |  |  |  |  |  |  |  |  |
|  | **M5** |  |  | **M6** |  |  | **M7** |  |  | **M8** |  |  |
|  | Coef. | Se | sig | Coef. | Se | sig | Coef. | Se | sig | Coef. | Se | sig |
|  |  |  |  |  |  |  |  |  |  |  |  |  |
|  |  |  |  |  |  |  |  |  |  |  |  |  |
| Strength of partisanship (SP) a | -1.85 | (13.36) |  | 27.58 | (20.69) |  | -14.35 | (14.74) |  | 28.27 | (17.66) |  |
|  |  |  |  |  |  |  |  |  |  |  |  |  |
| Perceived Openness (O) | 3.46 | (1.88) | † |  |  |  |  |  |  |  |  |  |
| SP * O | -0.37 | (2.48) |  |  |  |  |  |  |  |  |  |  |
|  |  |  |  |  |  |  |  |  |  |  |  |  |
| Perceived Narcissism (N) |  |  |  | -10.30 | (2.85) | *** |  |  |  |  |  |  |
| SP * N |  |  |  | -4.20 | (3.52) |  |  |  |  |  |  |  |
|  |  |  |  |  |  |  |  |  |  |  |  |  |
| Perceived Psychopathy (P) |  |  |  |  |  |  | -12.37 | (2.16) | *** |  |  |  |
| SP * P |  |  |  |  |  |  | 4.71 | (2.78) | † |  |  |  |
|  |  |  |  |  |  |  |  |  |  |  |  |  |
| Perceived Machiav. (M) |  |  |  |  |  |  |  |  |  | -10.49 | (1.98) | *** |
| SP * M |  |  |  |  |  |  |  |  |  | -3.51 | (2.98) |  |
|  |  |  |  |  |  |  |  |  |  |  |  |  |
| Constant | 49.12 | (10.31) | *** | 105.32 | (16.67) | *** | 104.47 | (11.29) | *** | 94.75 | (11.53) | *** |
|  |  |  |  |  |  |  |  |  |  |  |  |  |
|  |  |  |  |  |  |  |  |  |  |  |  |  |
| Observations | 188 |  |  | 182 |  |  | 188 |  |  | 183 |  |  |
| R-squared | 0.05 |  |  | 0.26 |  |  | 0.24 |  |  | 0.28 |  |  |
|  |  |  |  |  |  |  |  |  |  |  |  |  |

In all models the dependent variable is the feeling thermometer for the fictive candidate, and ranges between 0 “very cold” and 100 “very warm” feelings towards him.

a Binary variable (0 “Weak party attachment”, 1 “Strong party attachment”).

*** p<0.001, ** p<0.01, * p<0.05, † p<0.1

**Figure A1.** Perceived personality traits of the fictive candidate by exposure to vignettes


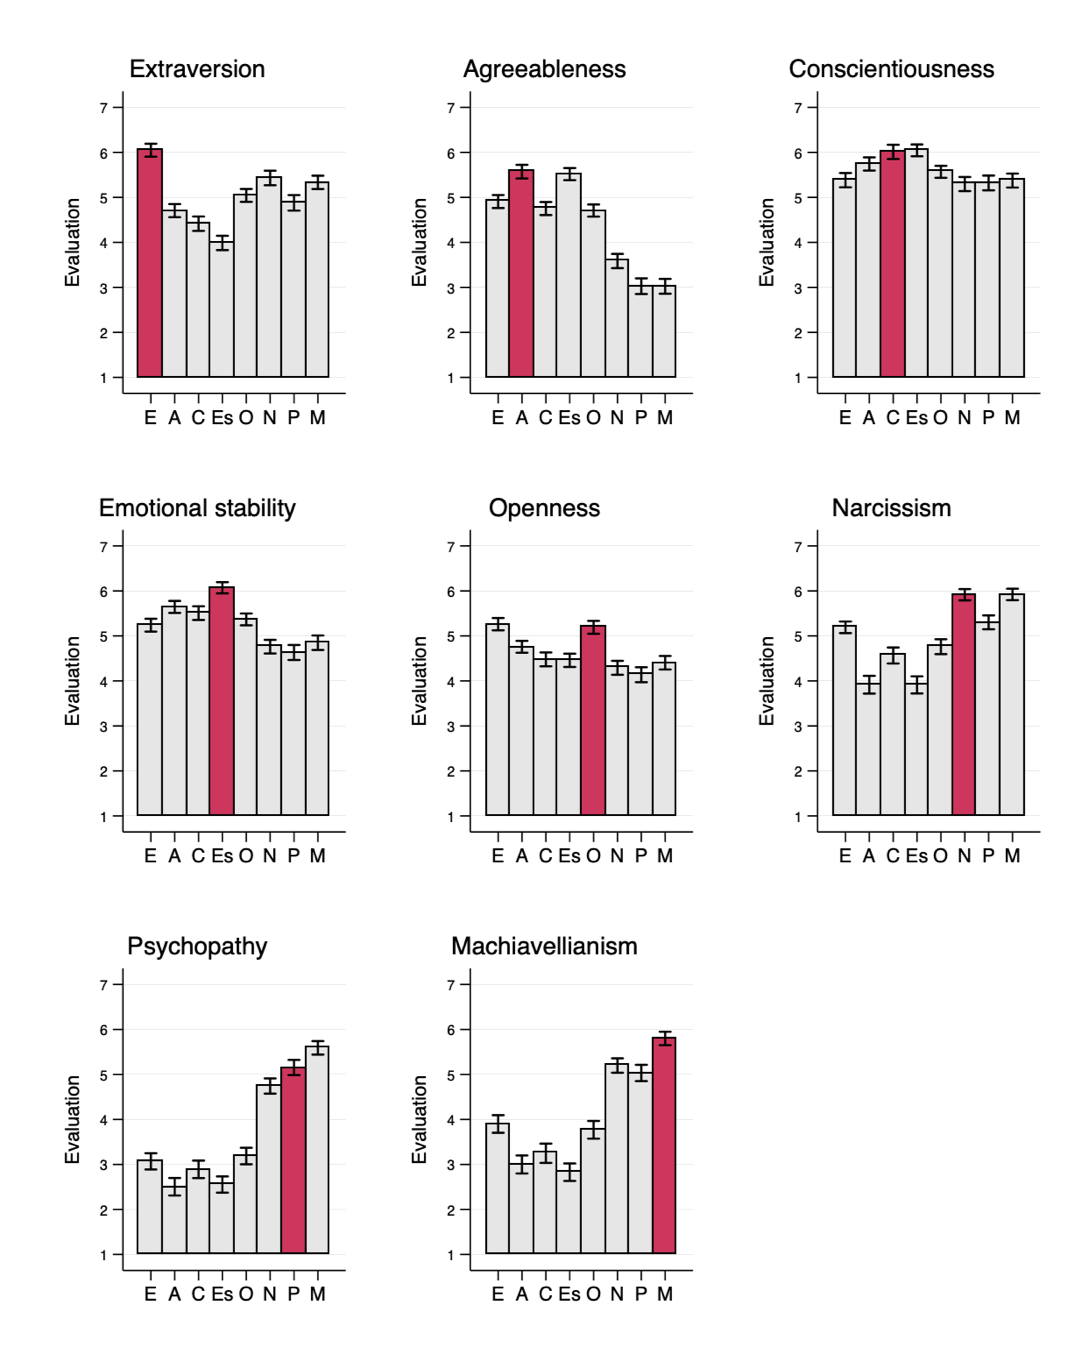


Note. In all panels, bars represent the “personality vignette” that respondents were randomly exposed to. In all panels, the y-axis represents the score that respondents assigned to the fictive candidate on the trait represented in the panel. Thus, for instance, the top-left panel presents the average score on extraversion that respondents have assigned to the fictive candidate, for each of the eight “personality vignettes” they were randomly exposed to.

Big Five: E ‘Extraversion’, A ‘Agreeableness’, C ‘Conscientiousness’, Es ‘Emotional Stability’, O 'Openness’

Dark Triad: N ‘Narcissism’, P ‘Psychopathy’, M ‘Machiavellianism’
